# Supplementary material for: Evaluating climate emulation: fundamental impulse testing of simple climate models
Source: Copernicus journal article supplement (doi:10.5194/esd-10-729-2019), 2019-11-13
Supplement: Supplementary file 1 [file esd-10-729-2019-supplement.zip]

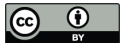

## *Supplement of*

# **Evaluating climate emulation: fundamental impulse testing of simple climate models**

**Adria K. Schwarber et al.**

*Correspondence to:* Adria K. Schwarber (adria.schwarber@gmail.com)

- esd-10-729-2019-supplement-title-page.pdf
- Supplement and Datasets
  - Inputs
    - \* AR5-IR
    - \* FAIR
    - \* Hector v2.0
    - \* MAGICC 5.3
    - \* MAGICC 6.0
  - Parameters
    - \* Dataset S61 MAGICC 6.0 MAGCFG\_USER parameters.CFG
    - \* Dataset S62 FAIRv1.0 model with general parameters.py
    - \* Dataset S63 AR5-IR general parameters.txt
    - \* Dataset S64 Hector general parameters.ini
    - \* Dataset S65 MAGICC5.3 maggas\_c parameters.cfg
    - \* Dataset S66 MAGICC5.3 magice\_c parameters.cfg
    - \* Dataset S67 MAGICC5.3 magmod\_c parameters.cfg
    - \* Dataset S68 MAGICC5.3 magrun\_c parameters.cfg
    - \* Dataset S69 MAGICC5.3 maguser\_c parameters.cfg
    - \* Dataset S70 MAGICC5.3 magextra\_c parameters.cfg
  - Responses
    - \* Dataset S1 Responses from 4xBC emissions step.csv
    - \* Dataset S2 Responses from 4xCO2 concentration step with 2.3 ocean diffusion and ECS=3.csv
    - \* Dataset S3 Responses from 100 Pg CO2 emissions impulse.csv
    - \* Dataset S4 Responses from a CH4 emissions impulse.csv
    - \* Dataset S5 Responses from a BC emissions impulse.csv
    - \* Dataset S6 Responses from CO2 concentration impulse.csv
    - \* Dataset S7 Responses from CO2 emissions impulse.csv
  - Schwarber et al. Supplement.pdf

The copyright of individual parts of the supplement might differ from the CC BY 4.0 License.
